# Supplementary material
Source: PubMed Central journal article supplement (PMC11376126)
Supplement: tpmd230608.SD1.pdf [file tpmd230608.SD1.pdf]

TF Prevalence %

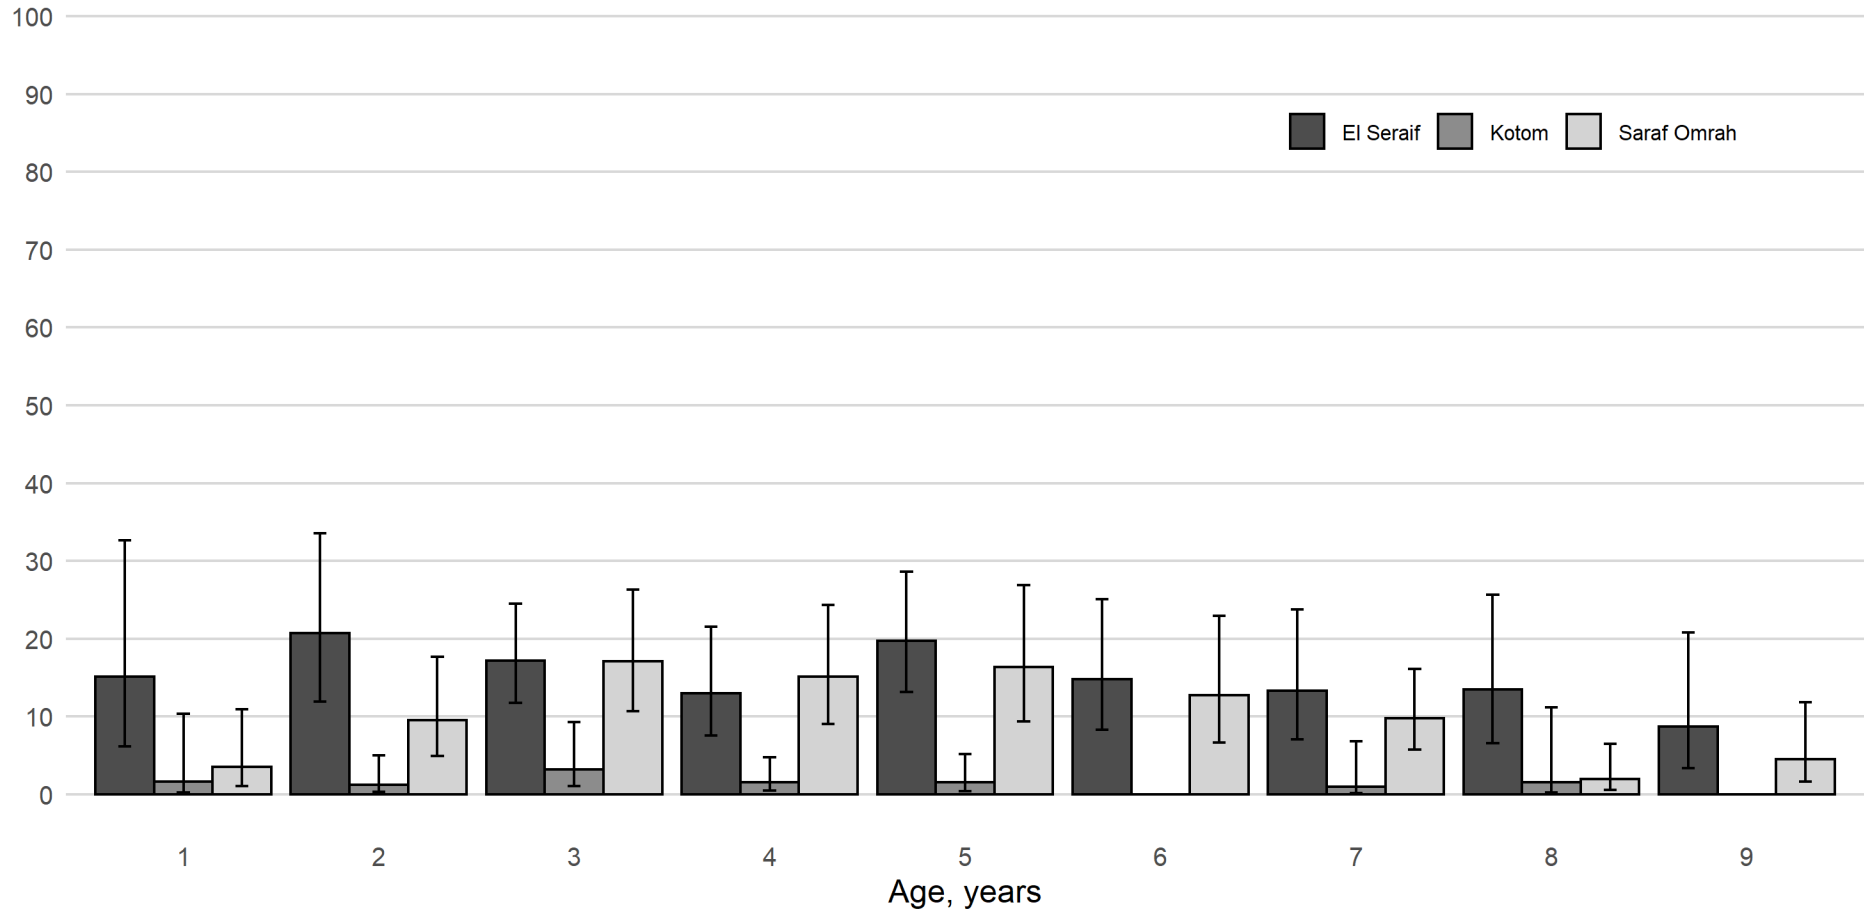

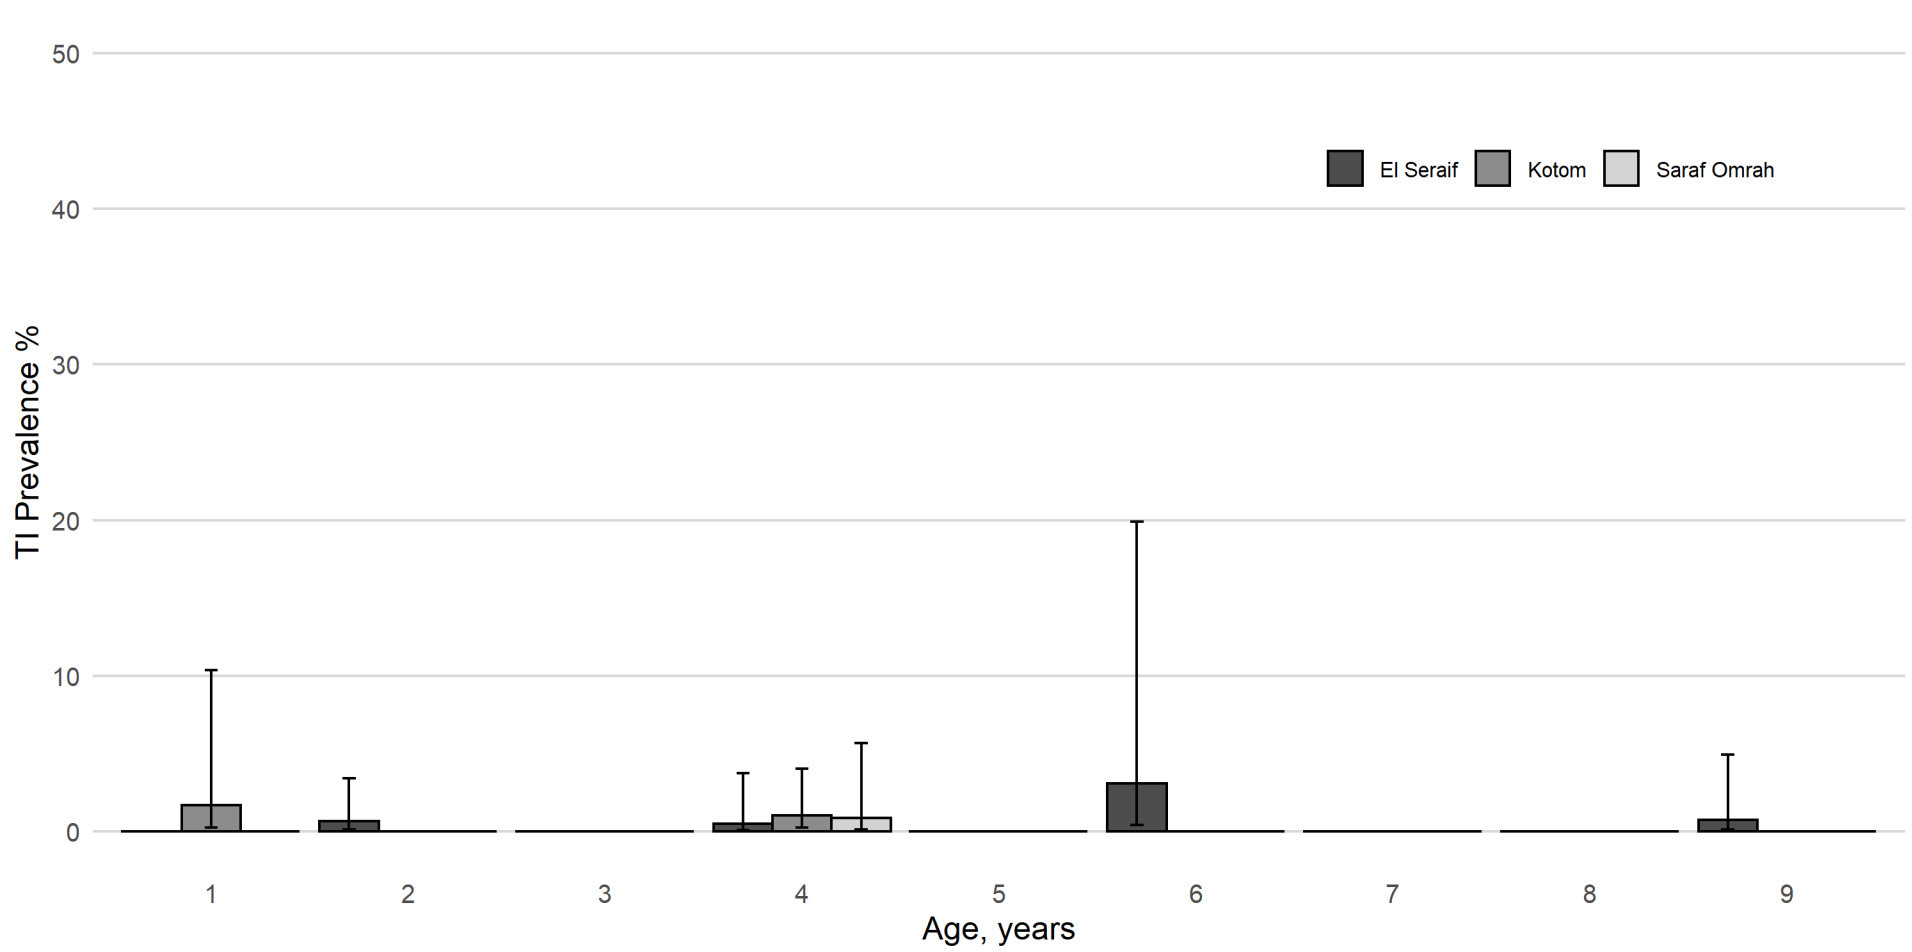

Supplemental Table 2. Full model diagnostics for the serocatalytic models within the 3 localities in North Darfur, Sudan, 2019-2020.

| District    | Antigen     | Model                | $\lambda_0$ (95%CrI)     | GR                       | ESS               | $\gamma$ (95%CrI) | GR  | ESS            | $\rho$ (95%CrI)          | GR                      | ESS               | $\lambda_1$ (95%CrI) | T <sub>c</sub>    | GR   | ESS    | LL            | DIC           |
|-------------|-------------|----------------------|--------------------------|--------------------------|-------------------|-------------------|-----|----------------|--------------------------|-------------------------|-------------------|----------------------|-------------------|------|--------|---------------|---------------|
| El Seraif   | <b>Pgp3</b> | <b>1*</b>            | <b>15.0 (14.1, 18.0)</b> | <b>1.0</b>               | <b>5127</b>       | -                 | -   | -              | <b>17.5 (16.2, 22.1)</b> | <b>1.0</b>              | <b>5186</b>       | -                    | -                 | -    | -      | <b>9107.9</b> | <b>3735.4</b> |
|             |             | <b>CT694</b>         | <b>1*</b>                | <b>11.3 (10.8, 13.3)</b> | <b>1.0</b>        | <b>5437</b>       | -   | -              | -                        | <b>10.3 (9.5, 12.9)</b> | <b>1.0</b>        | <b>5062</b>          | -                 | -    | -      | -             | <b>9482.6</b> |
|             | Pgp3        | 2                    | 79.4 (64.7, 107.3)       | 1.6                      | 18                | 15.5 (10.1, 29.2) | 1.3 | 41             | 21.6 (18.7, 25.9)        | 1.1                     | 69                | 0.12 (0.10, 0.15)    | 0.8 (0.7, 1.1)    | 1.0  | 19     | 696.4         | 3714.9        |
|             | CT694       | 2                    | 64.8 (53.7, 83.9)        | 5.4                      | 7                 | 16.4 (11.5, 41.7) | 3.2 | 13             | 17.0 (13.4, 19.7)        | 5.0                     | 22                | 0.10 (0.08, 0.13)    | 0.7 (0.5, 0.8)    | 7.1  | 14     | 2182.5        | 3689.3        |
|             | Pgp3        | 2-ip                 | 141.0 (103.2, 370.8)     | 3.1                      | 16                | 1.9 (5.0, 10.4)   | 1.1 | 86             | 4.2 (4.7, 5.2)           | 1.0                     | 651               | 0.07 (0.06, 0.08)    | 1.4 (1.0, 3.7)    | 12.0 | 589    | 2084.4        | 3848.1        |
| Kotom       | CT694       | 2-ip                 | 6.0 (5.9, 6.6)           | 2.0                      | 1366              | 12.5 (0.4, 97.4)  | 1.3 | 4              | 2.7 (2.4, 3.0)           | 1.0                     | 792               | 0.01(0.00, 0.06)     | 0.06 (0.05, 0.07) | 8.6  | 125    | 2903.3        | 3802.6        |
|             | <b>Pgp3</b> | <b>1*</b>            | <b>3.9 (3.8, 4.4)</b>    | <b>1.0</b>               | <b>3639</b>       | -                 | -   | -              | <b>2.1 (1.9, 2.6)</b>    | <b>1.0</b>              | <b>4094</b>       | -                    | -                 | -    | -      | <b>8544.5</b> | <b>3053.9</b> |
|             |             | <b>CT694</b>         | <b>1*</b>                | <b>3.4 (3.3, 3.8)</b>    | <b>1.0</b>        | <b>1777</b>       | -   | -              | -                        | <b>0.8 (0.7, 1.1)</b>   | <b>1.0</b>        | <b>1777</b>          | -                 | -    | -      | -             | <b>7558.6</b> |
|             | Pgp3        | 2                    | 39.4 (24.4, 130.2)       | 1.5                      | 48                | 9.2 (2.8, 27.9)   | 1.2 | 47             | 3.8 (3.1, 4.5)           | 1.0                     | 392               | 0.04 (0.03, 0.05)    | 0.4 (0.2, 1.3)    | 1.1  | 202    | 1715.2        | 2953.6        |
|             | CT694       | 2                    | 23.3 (16.9, 82.0)        | 1.3                      | 72                | 12.4 (3.7, 26.9)  | 1.2 | 136            | 2.2 (1.8, 2.7)           | 1.1                     | 572               | 0.035 (0.031, 0.039) | 0.82)             | 1.1  | 282    | 3668.2        | 2774          |
| Seraf Omrah | Pgp3        | 2-ip                 | 62.4 (44.7, 217.0)       | 2.9                      | 15                | 5.6 (1.6, 11.5)   | 1.0 | 141            | 3.3 (2.9, 3.7)           | 3.3                     | 811               | 0.03 (0.02, 0.04)    | 0.6 (0.5, 2.2)    | 12.8 | 385    | 4435.1        | 2977          |
|             | CT694       | 2-ip                 | 15.5 (12.5, 38.4)        | 1.1                      | 80                | 18.0 (7.3, 30.2)  | 1.0 | 204            | 1.9 (1.6, 2.2)           | 1.0                     | 728               | 0.03 (0.02, 0.04)    | 0.2 (0.1, 0.4)    | 1.0  | 411    | 4462.2        | 2792.8        |
|             | <b>Pgp3</b> | <b>1*</b>            | <b>10.5 (9.9, 12.3)</b>  | <b>1.0</b>               | <b>5195</b>       | -                 | -   | -              | <b>9.4 (8.6, 11.9)</b>   | <b>1.0</b>              | <b>4513</b>       | -                    | -                 | -    | -      | <b>9272.8</b> | <b>3482.3</b> |
|             |             | <b>CT694</b>         | <b>1*</b>                | <b>3.4 (3.3, 3.8)</b>    | <b>1.0</b>        | <b>4009</b>       | -   | -              | -                        | <b>0.8 (0.7, 1.1)</b>   | <b>1.0</b>        | <b>5347</b>          | -                 | -    | -      | -             | <b>8422.8</b> |
|             | Pgp3        | 2                    | 26.0 (10.3, 223.1)       | 1.5                      | 12                | 40.0 (4.7, 93.1)  | 1.7 | 4              | 9.5 (7.6, 17.0)          | 1.5                     | 78                | 0.10 (0.09, 0.12)    | 0.3 (0.1, 2.2)    | 1.7  | 137    | 1847.5        | 2999.0        |
| CT694       | 2           | 16.2 (10.1, 85.6)    | 2.1                      | 19                       | 52.4 (9.8, 80.2)  | 2.6               | 5   | 6.3 (4.8, 8.3) | 1.0                      | 306                     | 0.08 (0.07, 0.10) | 0.16 (0.10, 0.86)    | 1.2               | 232  | 1748.8 | 3289.5        |               |
| Pgp3        | 2-ip        | 133.9 (100.4, 260.9) | 3.0                      | 32                       | 5.1 (2.6, 10.5)   | 1.1               | 114 | 3.9 (3.4, 4.3) | 1.0                      | 789                     | 0.07 (0.06, 0.08) | 1.3 (1.0, 2.6)       | 7.9               | 475  | 2439.5 | 3509.5        |               |
| CT694       | 2-ip        | 8.5 (6.3, 29.4)      | 1.7                      | 76                       | 66.8 (19.2, 99.6) | 1.4               | 47  | 2.4 (2.1, 2.7) | 1.0                      | 1041                    | 0.06 (0.05, 0.07) | 0.08 (0.06, 0.30)    | 3.1               | 66   | 3071.9 | 3413.6        |               |

\*- best fitting model for each antigen for each district;  $\lambda_0$ - estimated seroconversion - Model 1, estimated seroconversion rate prior to the timepoint of change - Model 2;  $\gamma$ - proportional decline in transmission over time;  $\rho$ - seroreversion rate;  $\lambda_1$ - seroconversion rate after timepoint of change for Model 2; TC- timepoint of change (years ago) where significant seroconversion rate decline was detected; GR- Gelman-Rubin statistic; ESS- effective sample size; LL- log-likelihood; DIC- deviance information criteria.; -ip- indicates that a previously published informative prior for  $\gamma$  and/or  $\rho$  was applied to this model.
